# Supplementary material for: Accelerating anhydrous proton conduction via anion rotation and hydrogen bond recombination: a machine-learning molecular dynamics
Source: Royal Society of Chemistry journal article supplement (doi:10.1039/d3ta03164k), 2023-01-01
Supplement: d3ta03164k1.pdf [file d3ta03164k1.pdf]

## Supporting information

**Table S1** Number of molecules in unit cell

| Number of carbons ( $n_C$ ) | Systems                                                       | Number of molecules |
|-----------------------------|---------------------------------------------------------------|---------------------|
| 0                           | H <sub>3</sub> PO <sub>4</sub>                                | 48                  |
| 1                           | CH <sub>3</sub> PO <sub>3</sub> H <sub>2</sub>                | 48                  |
| 4                           | C <sub>4</sub> H <sub>9</sub> PO <sub>3</sub> H <sub>2</sub>  | 32                  |
| 7                           | C <sub>7</sub> H <sub>15</sub> PO <sub>3</sub> H <sub>2</sub> | 20                  |

**Table S2** Parameters of descriptors and kernel function. See details of the symbols in main text and ref. <sup>56</sup>

| Parameter     | Value | Parameter       | Value | Parameter   | Value |
|---------------|-------|-----------------|-------|-------------|-------|
| $\zeta$       | 4     | $\sigma_{atom}$ | 0.5 Å | $L_{max}$   | 2     |
| $\beta^{(2)}$ | 0.5   | $R_{cut}^{(2)}$ | 6 Å   | $N_R^{(2)}$ | 8     |
| $\beta^{(3)}$ | 0.5   | $R_{cut}^{(3)}$ | 4 Å   | $N_R^{(3)}$ | 6     |

**Table S3** Number of molecules in the unit cells for training

| Number of carbons ( $n_C$ ) | Systems                                                       | Number of molecules |
|-----------------------------|---------------------------------------------------------------|---------------------|
| 0                           | H <sub>3</sub> PO <sub>4</sub>                                | 32                  |
| 1                           | CH <sub>3</sub> PO <sub>3</sub> H <sub>2</sub>                | 24                  |
| 4                           | C <sub>4</sub> H <sub>9</sub> PO <sub>3</sub> H <sub>2</sub>  | 20                  |
| 7                           | C <sub>7</sub> H <sub>15</sub> PO <sub>3</sub> H <sub>2</sub> | 12                  |

**Table S4** Elapsed time per MD step for 32 PA by the MLFF and FP method. The elapsed time was measured by using 16 cores of Intel Xeon Platinum 8358 (2.6 GHz).

|                      | FP | MLFF  |
|----------------------|----|-------|
| Elapse time (s/step) | 92 | 0.024 |

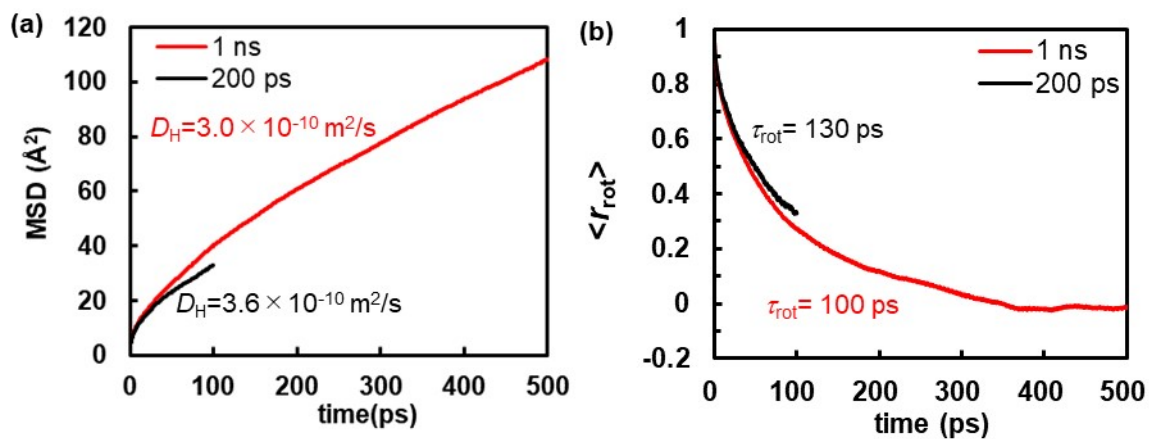

**Fig. S1** Comparison of (a) MSD of hydrogen and (b)  $\langle r_{\text{rot}}(t) \rangle$  for  $n_C = 7$  at 463K evaluated from 1 ns and 200 ps trajectories.

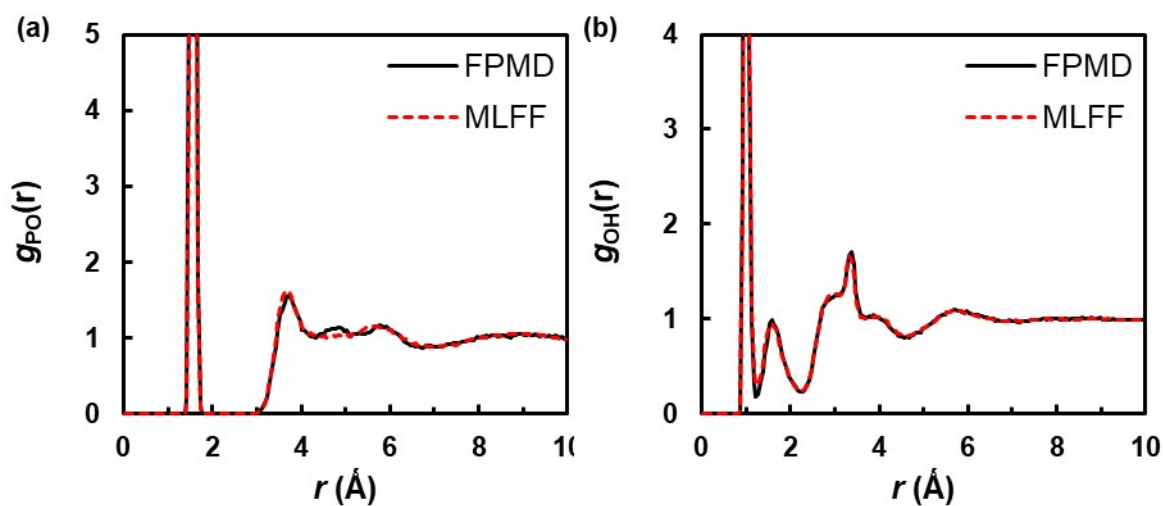

**Fig. S2** Comparison of the radial distribution functions of (a) P-O ( $g_{\text{PO}}$ ) and (b) O-H ( $g_{\text{OH}}$ ) for liquid phosphoric acid (PA) calculated by machine-learned force field (MLFF) and First principles molecular dynamics simulation (FPMD) methods.

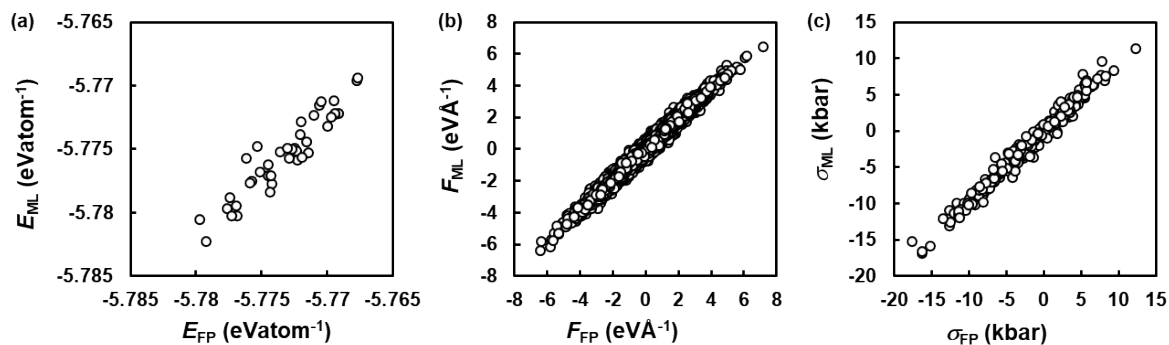

**Fig. S3** (a) Energies, (b) forces, and (c) stress tensor components of liquid PA predicted by the MLFF and FPMD methods.

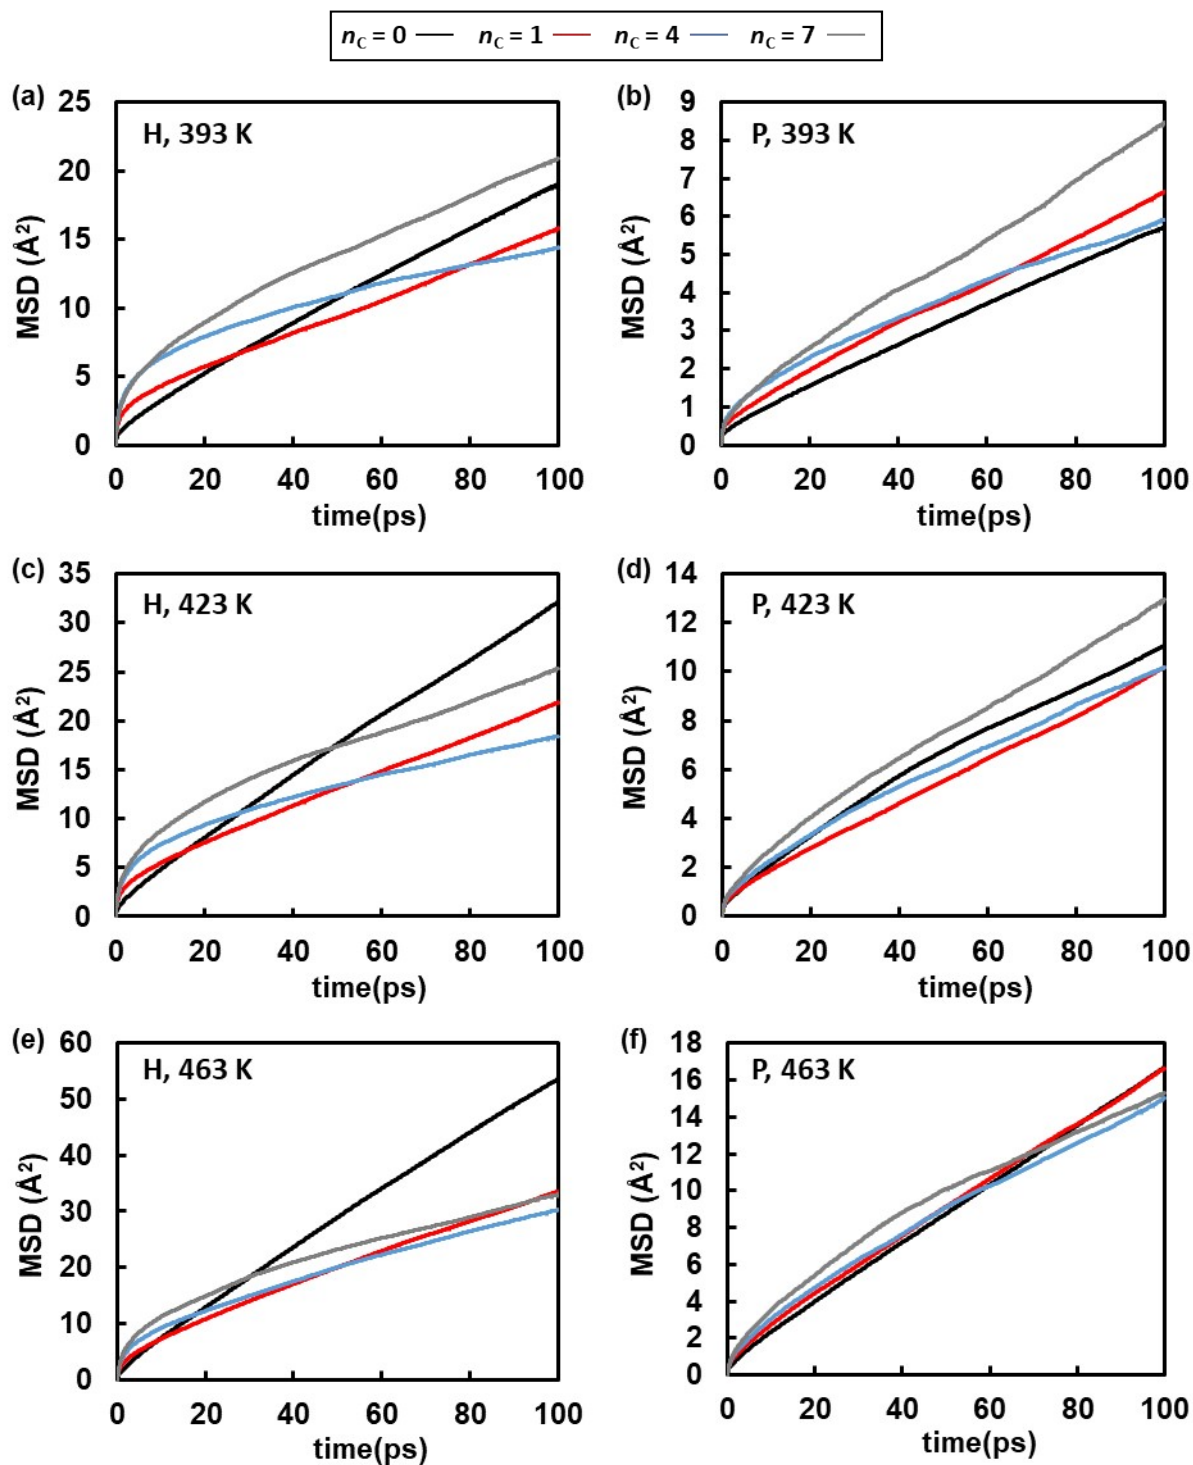

Fig. S4 Mean square displacements (MSDs) of hydrogen and phosphorus atoms at 393, 423, and 463 K.

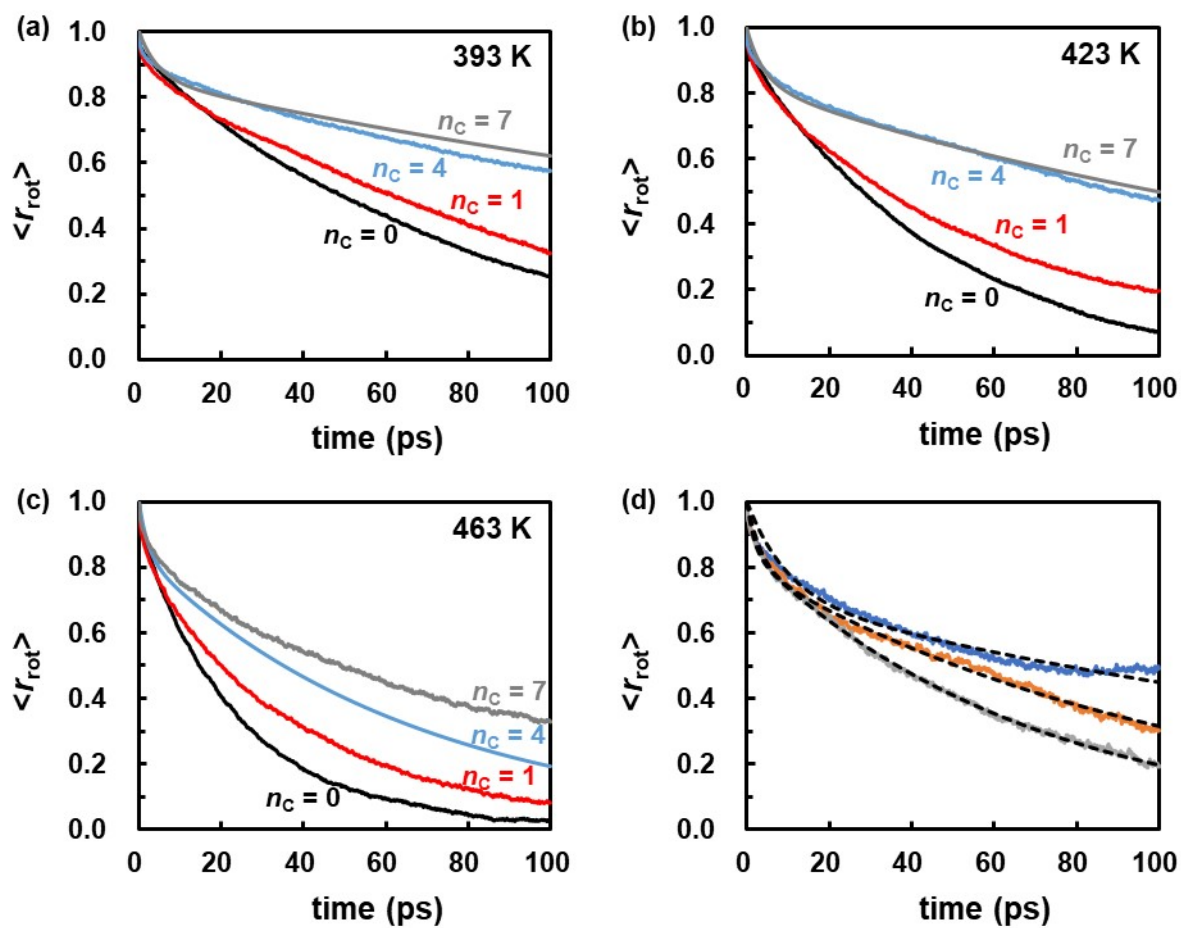

**Fig. S5** Autocorrelation functions of P-O vectors ( $\langle r_{rot}(t) \rangle$ ) defined using Eq. (5) at (a) 393, (b) 423, and (c) 463 K. Each data point is average over three MD trajectories that started from different initial structures. (d) The raw data before averaging (solid line) and fitted lines determined using Eq. (6) (dashed line) for  $n = 7$  at 463 K.
